# Supplementary material
Source: PubMed Central journal article supplement (PMC3669650)
Supplement: NIHMS450765-supplement-520_2013_1766_MOESM1_ESM.pdf [file NIHMS450765-supplement-520_2013_1766_MOESM1_ESM.pdf]

Supplemental Table 1. Differences in individual motor neuropathy scores between fallers/non-fallers and those with and without functional impairment.

| Item                                                             | Total |       | Any Fall |       | No Fall |       | P       |
|------------------------------------------------------------------|-------|-------|----------|-------|---------|-------|---------|
|                                                                  | N     | %     | N        | %     | N       | %     |         |
| 37 cramps hands                                                  |       |       |          |       |         |       |         |
| High                                                             | 195   | 42.0% | 29       | 58.0% | 145     | 39.0% | 0.0110  |
| Low                                                              | 269   | 58.0% | 21       | 42.0% | 227     | 61.0% |         |
| 38 cramps feet                                                   |       |       |          |       |         |       |         |
| High                                                             | 286   | 61.6% | 33       | 66.0% | 225     | 60.5% | 0.4491  |
| Low                                                              | 178   | 38.4% | 17       | 34.0% | 147     | 40.0% |         |
| 41 Holding a pen                                                 |       |       |          |       |         |       |         |
| High                                                             | 239   | 51.5% | 37       | 74.0% | 180     | 48.4% | 0.0005* |
| Low                                                              | 225   | 58.5% | 13       | 26.0% | 192     | 51.6% |         |
| 42 manipulating small objects                                    |       |       |          |       |         |       |         |
| High                                                             |       |       |          |       |         |       | 0.2058  |
| Low                                                              | 355   | 76.7% | 42       | 84.0% | 283     | 76.3% |         |
|                                                                  | 108   | 23.3% | 8        | 16.0% | 88      | 23.7% |         |
| 43 difficulty opening a jar                                      |       |       |          |       |         |       |         |
| High                                                             | 363   | 78.2% | 43       | 86.0% | 288     | 77.4% | 0.1478  |
| Low                                                              | 101   | 21.8% | 7        | 14.0% | 84      | 22.6% |         |
| 44 walking bc feet dropped downwards                             |       |       |          |       |         |       |         |
| High                                                             | 186   | 40.3% | 30       | 61.2% | 139     | 37.6% | 0.0017* |
| Low                                                              | 275   | 59.7% | 19       | 38.8% | 231     | 62.4% |         |
| 45 difficulty walking up stairs because of weakness in your legs |       |       |          |       |         |       |         |
| High                                                             |       |       |          |       |         |       | 0.0282  |
| Low                                                              | 321   | 69.3% | 41       | 82.0% | 250     | 67.4% |         |
|                                                                  | 142   | 30.7% | 9        | 18.0% | 121     | 32.6% |         |

| Item                                                            | Total |       | Any ADL |       | No ADL |       | P        |
|-----------------------------------------------------------------|-------|-------|---------|-------|--------|-------|----------|
|                                                                 | N     | %     | N       | %     | N      | %     |          |
| 37 cramps hands                                                 |       |       |         |       |        |       |          |
| High                                                            | 195   | 42.0% | 61      | 54.5% | 116    | 37.3% | 0.0017*  |
| Low                                                             | 269   | 58.0% | 51      | 45.5% | 195    | 62.7% |          |
| 38 cramps feet                                                  |       |       |         |       |        |       |          |
| High                                                            | 286   | 61.6% | 78      | 69.6% | 180    | 57.9% | 0.0269   |
| Low                                                             | 178   | 38.4% | 34      | 30.4% | 131    | 42.1% |          |
| 41 Holding a pen                                                |       |       |         |       |        |       |          |
| High                                                            | 239   | 51.5% | 83      | 74.1% | 132    | 42.4% | <0.0001* |
| Low                                                             | 225   | 58.5% | 29      | 25.9% | 179    | 49.2% |          |
| 42 manipulating small objects                                   |       |       |         |       |        |       |          |
| High                                                            |       |       |         |       |        |       | 0.0006*  |
| Low                                                             | 355   | 76.7% | 97      | 87.4% | 224    | 72.0% |          |
|                                                                 | 108   | 23.3% | 14      | 12.6% | 87     | 28.0% |          |
| 43 difficulty opening a jar                                     |       |       |         |       |        |       |          |
| High                                                            | 363   | 78.2% | 103     | 92.0% | 228    | 73.3% | <0.0001* |
| Low                                                             | 101   | 21.8% | 9       | 8.0%  | 83     | 26.7% |          |
| 44 walking bc feet dropped downwards                            |       |       |         |       |        |       |          |
| High                                                            | 186   | 40.3% | 70      | 63.1% | 101    | 32.6% | <0.0001* |
| Low                                                             | 275   | 59.7% | 41      | 36.9% | 209    | 67.4% |          |
| 45 difficulty walking up stairs because of weakness in the legs |       |       |         |       |        |       |          |
| High                                                            | 321   | 69.3% | 102     | 91.9% | 191    | 61.4% | <0.0001* |
| Low                                                             | 142   | 30.7% | 9       | 8.1%  | 120    | 38.6% |          |

\*p<0.0036 (Bonferroni correction for 14 items).
